# Supplementary material for: Transfer of Viral Communities between Human Individuals during Fecal Microbiota Transplantation
Source: PubMed Central journal article supplement (PMC4817255; doi:10.1128/mbio.00322-16), 2016-03-29
Supplement: mbo002162747st2.pdf [file mbo002162747st2.pdf]

Supplementary Table 2. Human Reads in the Samples Analyzed.

| <b>Sample</b>        | <b>Total</b> | <b>Total Paired</b> | <b>Filtered (Non-Human)</b> | <b>Filtered (Non-Human) Paired</b> | <b>Fraction Non-Human</b> |
|----------------------|--------------|---------------------|-----------------------------|------------------------------------|---------------------------|
| Donor stool 1        | 1302182      | 651091              | 1293112                     | 646556                             | 0.99                      |
| Donor stool 2        | 1186822      | 593411              | 1186636                     | 593318                             | 1                         |
| Donor processed 1    | 2033390      | 1016695             | 2032440                     | 1016220                            | 1                         |
| Donor processed 2    | 1503192      | 751596              | 1502982                     | 751492                             | 1                         |
| Patient 1 Pre FMT    | 2621796      | 1310898             | 2621596                     | 1310798                            | 1                         |
| Patient 1 During FMT | 1471624      | 735812              | 1471514                     | 735757                             | 1                         |
| Patient 1 Post FMT   | 1251230      | 625615              | 1250750                     | 625375                             | 1                         |
| Patient 2 Pre FMT    | 6542970      | 3271485             | 6542024                     | 3271018                            | 1                         |
| Patient 2 During FMT | 1353574      | 676787              | 1353388                     | 676694                             | 1                         |
| Patient 2 Post FMT   | 1530278      | 765139              | 1530172                     | 765086                             | 1                         |
| Patient 3 Pre FMT    | 7493706      | 3746853             | 7493300                     | 3746650                            | 1                         |
| Patient 3 During FMT | 1290234      | 645117              | 1290134                     | 645068                             | 1                         |
| Patient 3 Post FMT   | 1481912      | 740956              | 1481704                     | 740852                             | 1                         |
| Control Subject 1    | 952528       | 476264              | 952390                      | 476195                             | 1                         |
| Control Subject 2    | 1315944      | 657972              | 1315794                     | 657897                             | 1                         |
| Control Subject 3    | 1987936      | 993968              | 1987616                     | 993809                             | 1                         |
| Control SM Buffer 1  | 1282         | 641                 | 1242                        | 621                                | 0.97                      |
| Control SM Buffer 2  | 37774        | 18887               | 36156                       | 18078                              | 0.96                      |
